# Supplementary material for: Enhancing the performance of polymer solar cells by tuning the drying process of blend films via changing side chains and using solvent additives
Source: Royal Society of Chemistry journal article supplement (doi:10.1039/c5tc01788b), 2015-01-01
Supplement: c5tc01788b1.pdf [file c5tc01788b1.pdf]

## Supporting Information

### Enhancing the performance of polymer solar cells by tuning the drying process of blend films via changing side chains and using solvent additive

Jicheng Zhang, Xuejuan Zhang, Guangwu Li, Wenhua li,\* Chong Kang, Xiuxiu Zhao, Heng Lu, Zhishan Bo\*

*Beijing Key Laboratory of Energy Conversion and Storage Materials, College of Chemistry, Beijing Normal University, Beijing 100875, China*  
E-mail: liwenhua@bnu.edu.cn ,zsbo@bnu.edu.cn

#### 1.1 Measurements and characterization

Unless otherwise noted, all reactions were carried out under a nitrogen atmosphere and monitored by thin layer chromatography (TLC) on silica gel plates.  $^1\text{H}$  and  $^{13}\text{C}$  NMR spectra were recorded on a Bruker AV 400 spectrometer. UV-visible absorption spectra were measured on a PerkinElmer UV-vis spectrometer model Lambda 750. Thermal gravimetric analysis (TGA) and differential scanning calorimetry (DSC) were performed on TA2100 and Perkin-Elmer Diamond differential scanning calorimetry (DSC) instrument, respectively, under an atmosphere of nitrogen at a heating rate of  $10\text{ }^\circ\text{C}/\text{min}$ . Atomic force microscopy (AFM) measurements were carried out under ambient conditions using a Digital Instrument Multimode Nanoscope IIIA using the tapping mode. The thickness of blend films was measured by a Dektak 6 M surface profilometer. XRD experiments were carried out by X' Pert PRO MPD instrument. The electrochemical behavior of polymers was studied using cyclic voltammetry (CHI 630A Electrochemical Analyzer) with a three-electrode electrochemical cell in a  $0.1\text{ M Bu}_4\text{NPF}_6\text{ CH}_3\text{CN}$  solution under an atmosphere of nitrogen with a scanning rate of  $0.1\text{ V/S}$ . A Pt plate working electrode, a Pt wire counter electrode, and an  $\text{Ag}/\text{AgNO}_3$  ( $0.01\text{ M}$  in  $\text{CH}_3\text{CN}$ ) reference electrode were used.

#### 1.2 Polymer Solar Cells Fabrication and Characterization

PSCs were fabricated with the device configuration of ITO/PEDOT:PSS (40 nm)/**P1-3**:PC<sub>71</sub>BM/LiF (0.5 nm)/Al (100 nm). The conductivity of ITO is 20  $\Omega$ . PEDOT:PSS (Baytron Al 4083 from H.C. Starck) was filtered with a 0.45  $\mu$ m polyvinylidene difluoride (PVDF) film before use. A PEDOT:PSS thin layer was spin-coated on top of the cleaned ITO substrate at 3000 rpm/s for 60 s and dried subsequently at 130  $^{\circ}$ C for 20 min on a hotplate. The thickness of the PEDOT:PSS layer is about 30 nm. A mixture of **P1-3** and PC<sub>71</sub>BM in 1,2-dichlorobenzene (DCB) was stirred at dissolving temperature overnight to ensure sufficient dissolution and then the blend solution was spin-coated onto PEDOT:PSS layer to form active layer. Thermal annealing was carried out after the spin-coating process on a hotplate. A top electrode of 0.5 nm LiF and 100 nm of aluminum was thermally evaporated at a pressure of  $10^{-4}$  Pa through a shadow mask. On one substrate five cells with an effective area of 0.04 cm<sup>2</sup> for each were fabricated. Current-voltage (I-V) and external quantum efficiency (EQE) measurements were conducted in air without encapsulation. I-V characteristics were recorded at room temperature using an Agilent B2902A Source Meter under the illumination of an AM1.5G AAA class solar simulator (model XES-301S, SAN-EI) with an intensity of 100 mW cm<sup>-2</sup> and the white light intensity was calibrated with a standard single-crystal Si solar cell.

### 1.3 Space-Charge Limited Current Measurement

Hole-only devices with a structure of ITO/PEDOT:PSS (30 nm)/ **P1-3**:PC<sub>71</sub>BM /Au (100 nm) were fabricated. The blend solution of **P1-3** and PC<sub>71</sub>BM in 1,2-dichlorobenzene (DCB) was spin-coated onto PEDOT:PSS layer to form active layer like PSC devices, and 100 nm of Au was thermally evaporated at a pressure of  $10^{-4}$  Pa through a shadow mask. Dark J–V curves of the hole-only devices were measured by the space-charge limited current (SCLC) method.

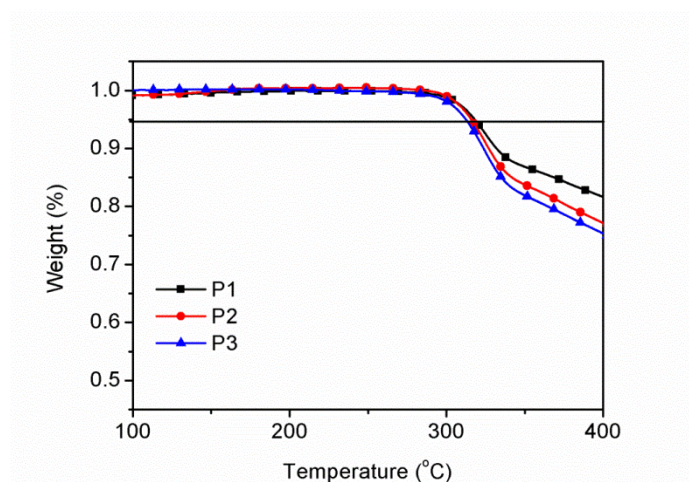

Fig. S1 TGA curves of **P1-3**.

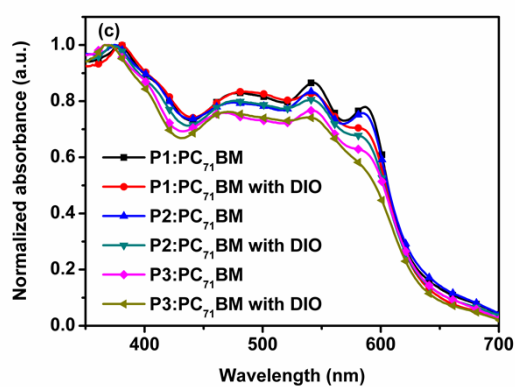

Fig. S2 UV-vis absorption spectra of **P1-3** based blend films without and with 2% DIO.

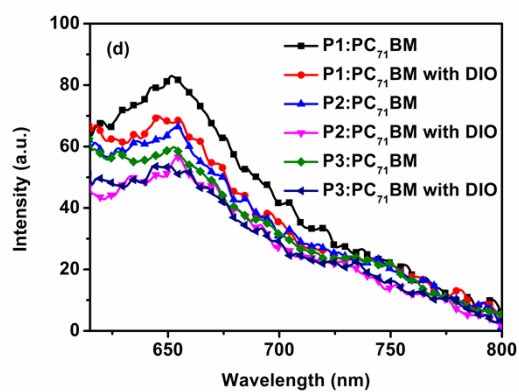

Fig. S3 Fluorescence spectra of **P1-3** based blend films without and with 2% DIO.

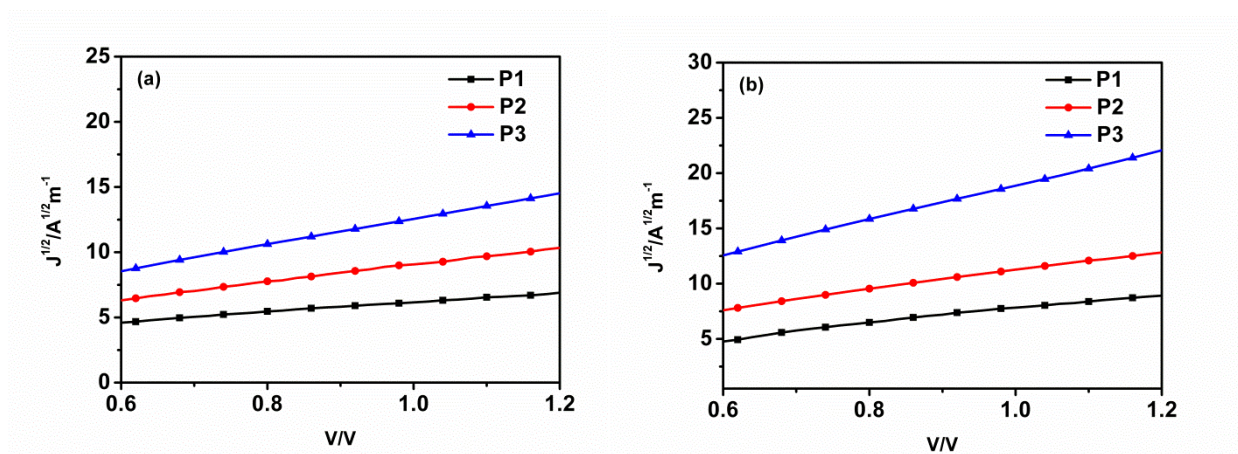

Fig. S4 Hole mobility of **P1-3**:PC<sub>71</sub>BM based devices without (a) and with 2% DIO (b) by SCLC.

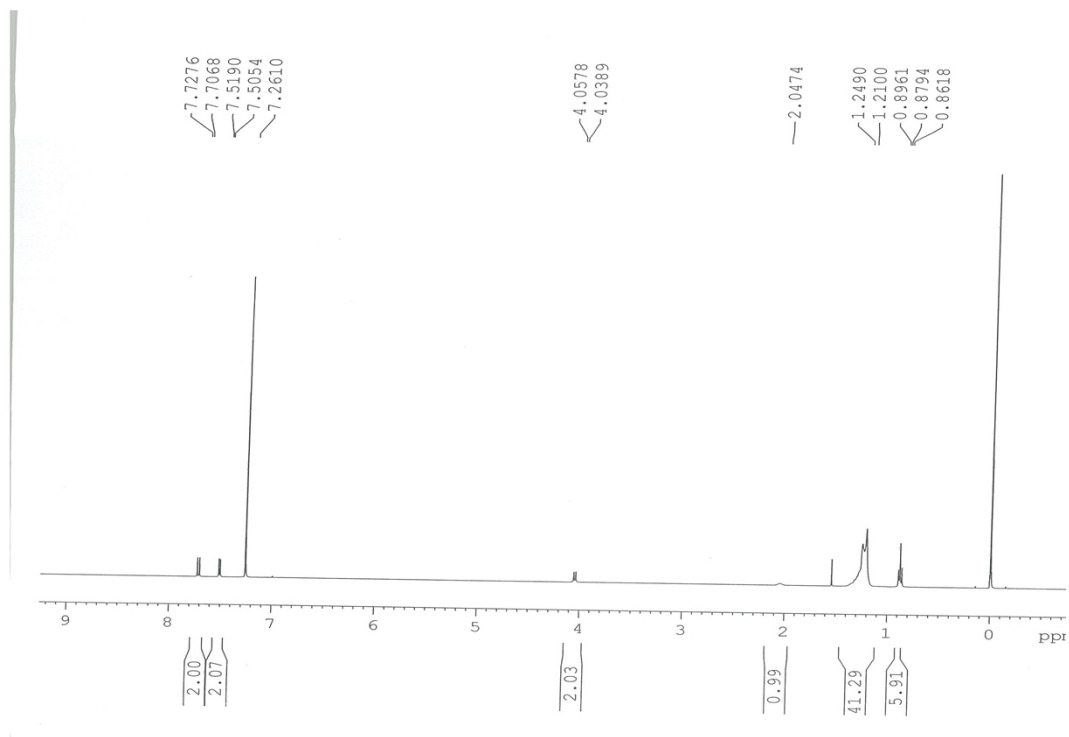

Fig. S5 <sup>1</sup>H NMR spectrum of **compound 2b** (measured in CDCl<sub>3</sub>).

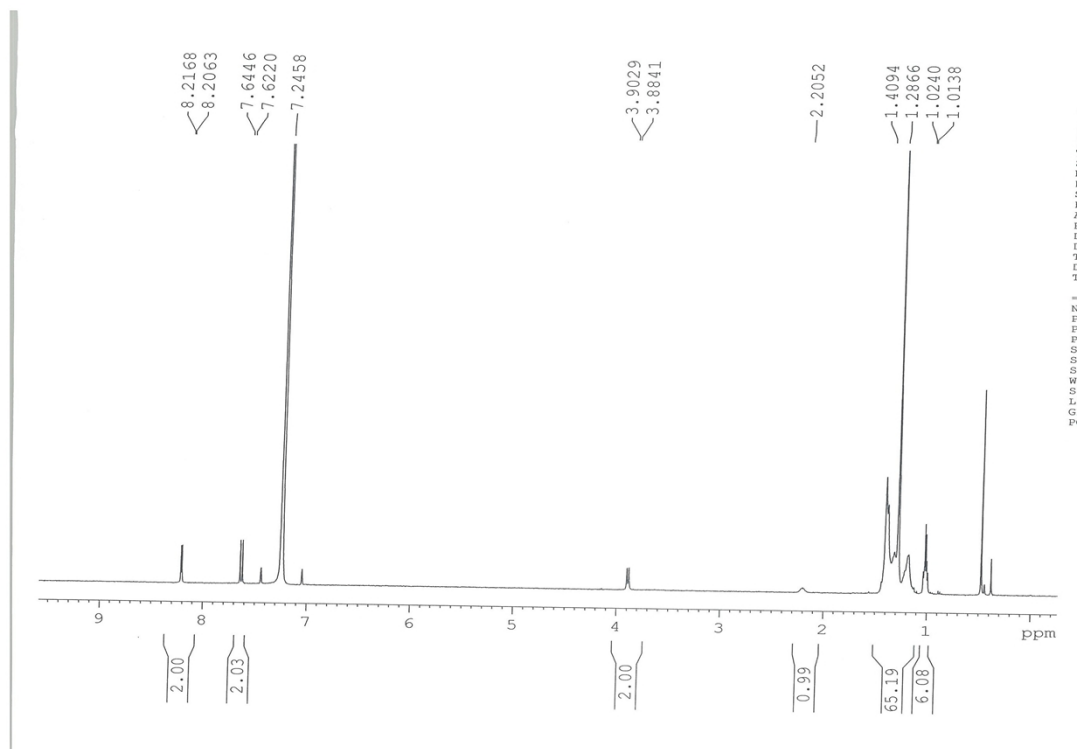

Fig. S6 <sup>1</sup>H NMR spectrum of **compound 3b** (measured in CDCl<sub>3</sub>).

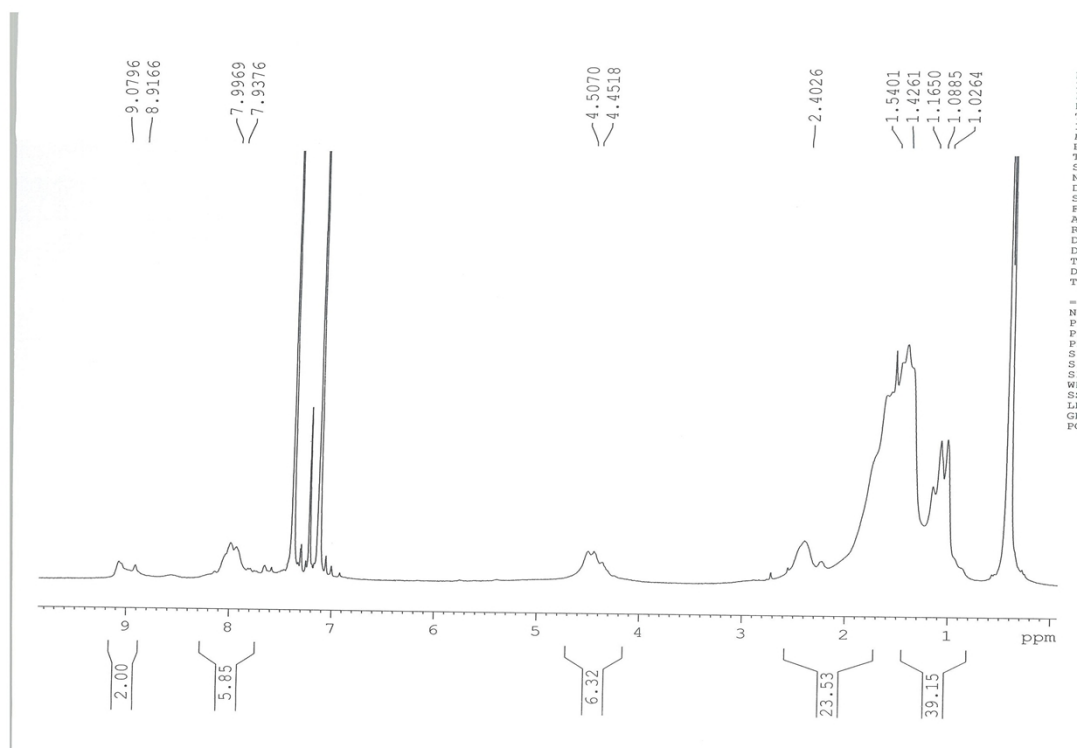

Fig. S7 <sup>1</sup>H NMR spectrum of **P1** (measured in 1,2-dichlorobenzene-d<sub>4</sub>).

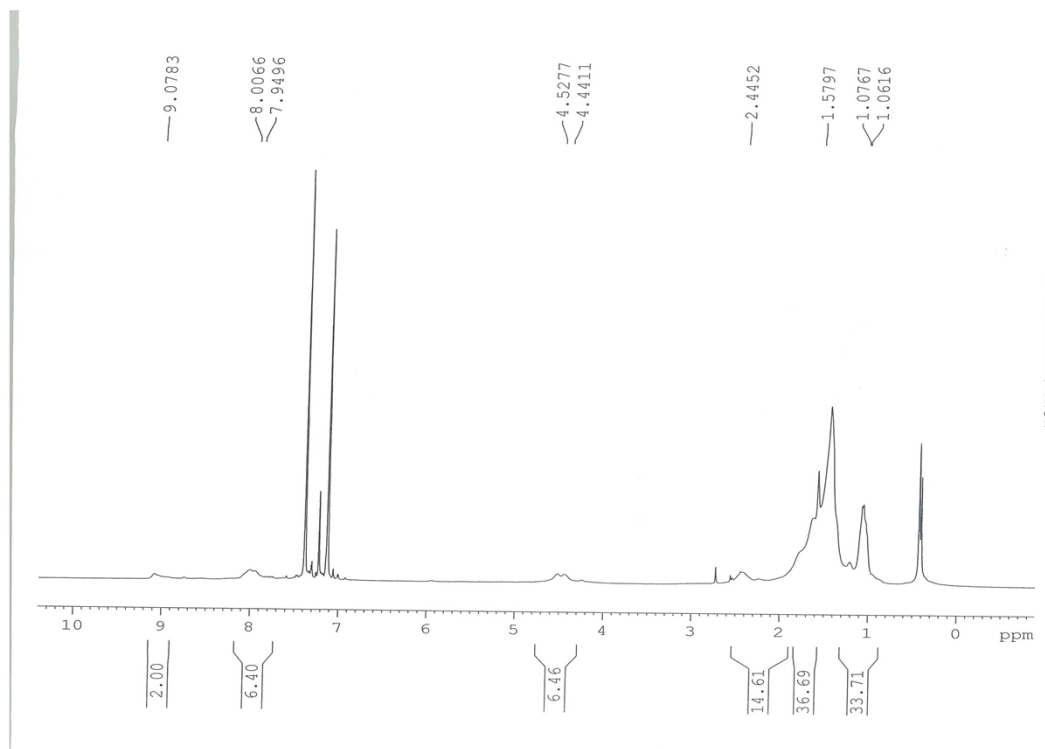

Fig. S8  $^1\text{H}$  NMR spectrum of **P2** (measured in 1,2-dichlorobenzene- $d_4$ ).

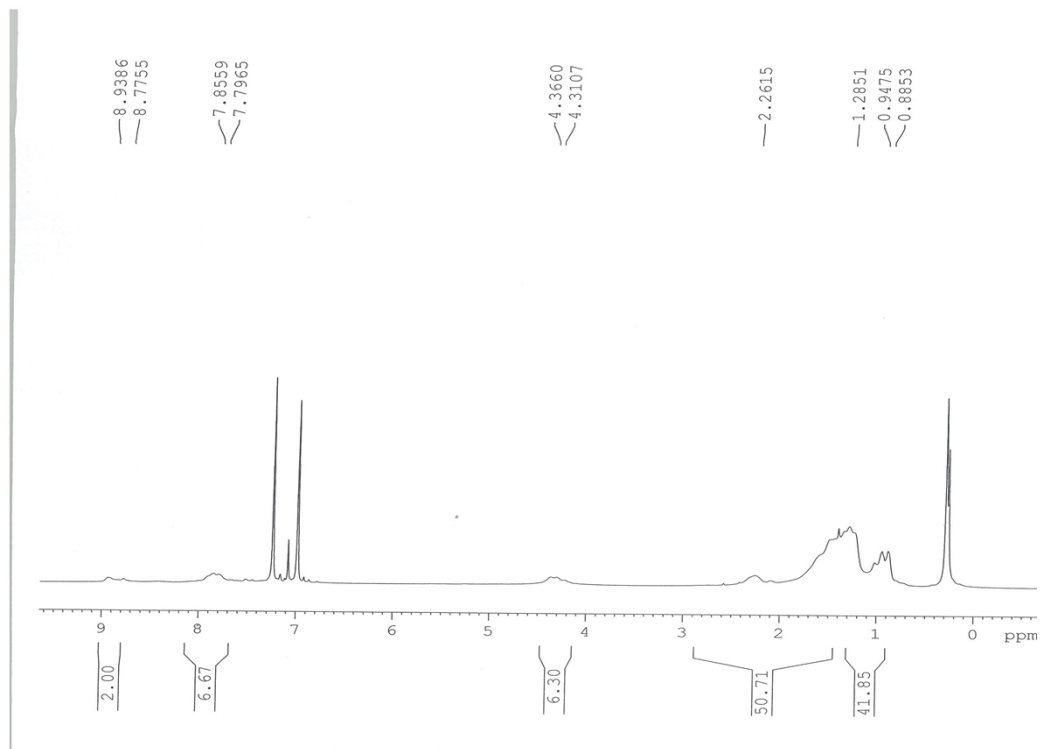

Fig. S9  $^1\text{H}$  NMR spectrum of **P3** (measured in 1,2-dichlorobenzene- $d_4$ ).
